# Supplementary material for: Two-way communication between SecY and SecA suggests a Brownian ratchet mechanism for protein translocation
Source: eLife journal article supplement (doi:10.7554/elife.15598), 2016-05-16
Supplement: supp [file elife-15598-supp-v1.zip]

Archive with 14 entries (14 files):
- elife_poa_e15598_Figure_6_figure_supplement_2.pdf
- elife_poa_e15598_Figure_5_figure_supplement_1.pdf
- elife_poa_e15598_Figure_5_figure_supplement_2.pdf
- elife_poa_e15598_Movie_1.mp4
- elife_poa_e15598_Figure_2_figure_supplement_2.pdf
- elife_poa_e15598_Figure_6_figure_supplement_1.pdf
- elife_poa_e15598_Figure_6_figure_supplement_3.pdf
- elife_poa_e15598_Figure_4_figure_supplement_2.pdf
- elife_poa_e15598_Figure_7_figure_supplement_1.pdf
- elife_poa_e15598_Figure_5_figure_supplement_3.pdf
- elife_poa_e15598_Figure_4_figure_supplement_1.pdf
- elife_poa_e15598_Figure_7_figure_supplement_3.pdf
- elife_poa_e15598_Figure_7_figure_supplement_2.pdf
- elife_poa_e15598_Figure_2_figure_supplement_1.pdf
