# Supplementary figures and images for: Two-way communication between SecY and SecA suggests a Brownian ratchet mechanism for protein translocation
Source: eLife journal article supplement (doi:10.7554/elife.15598), 2016-05-16

Figure 6S2 – Allen *et al.* 2016 – eLIFE

A

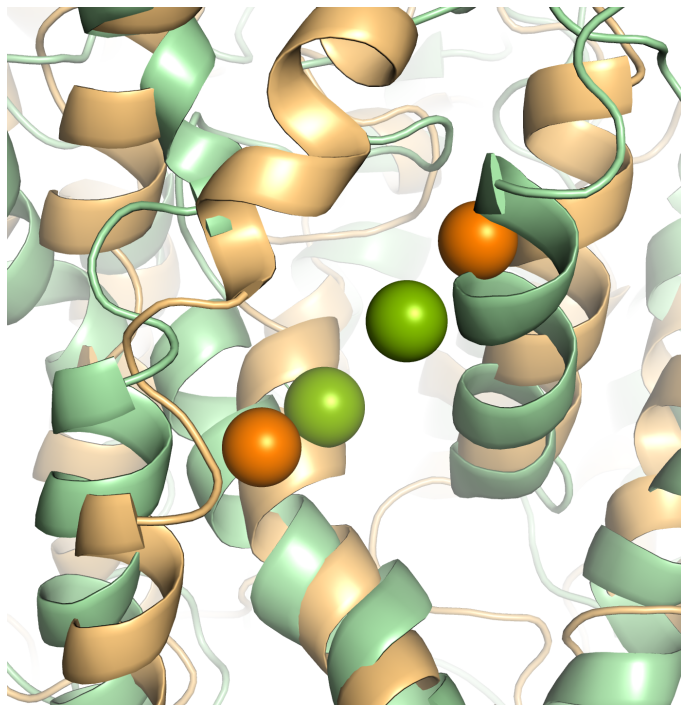

B

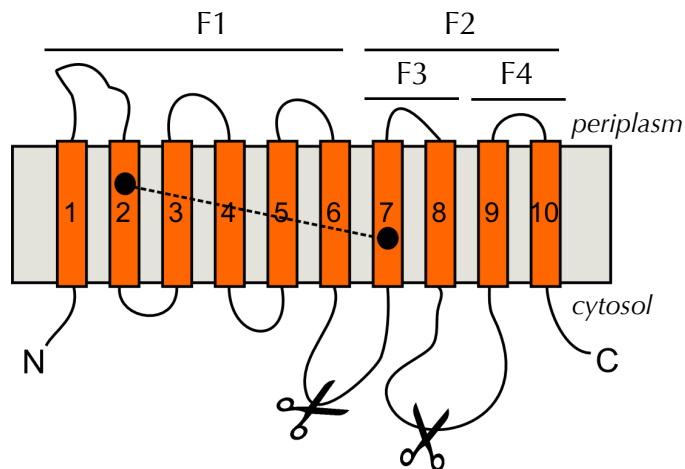

C

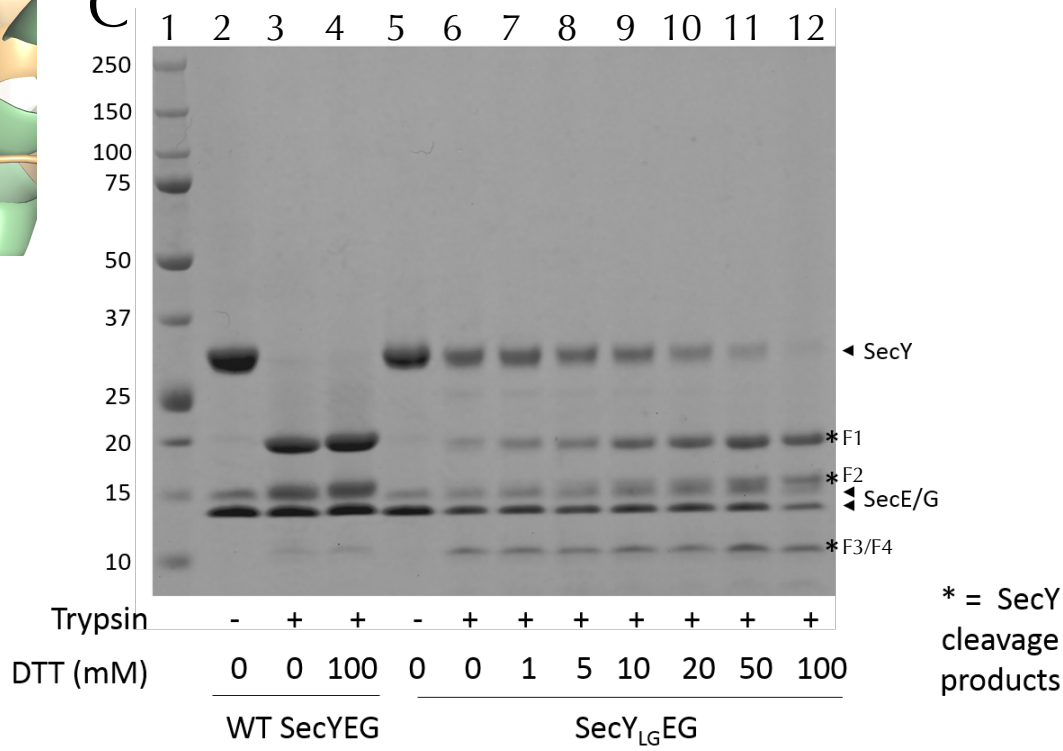

D

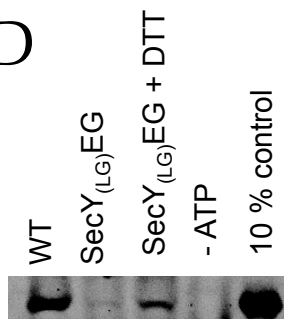

Supplement: supp [file elife-15598-supp-v1.zip › elife_poa_e15598_Figure_6_figure_supplement_2.pdf]

# Figure 5S1 – Allen *et al.* 2016 – eLIFE

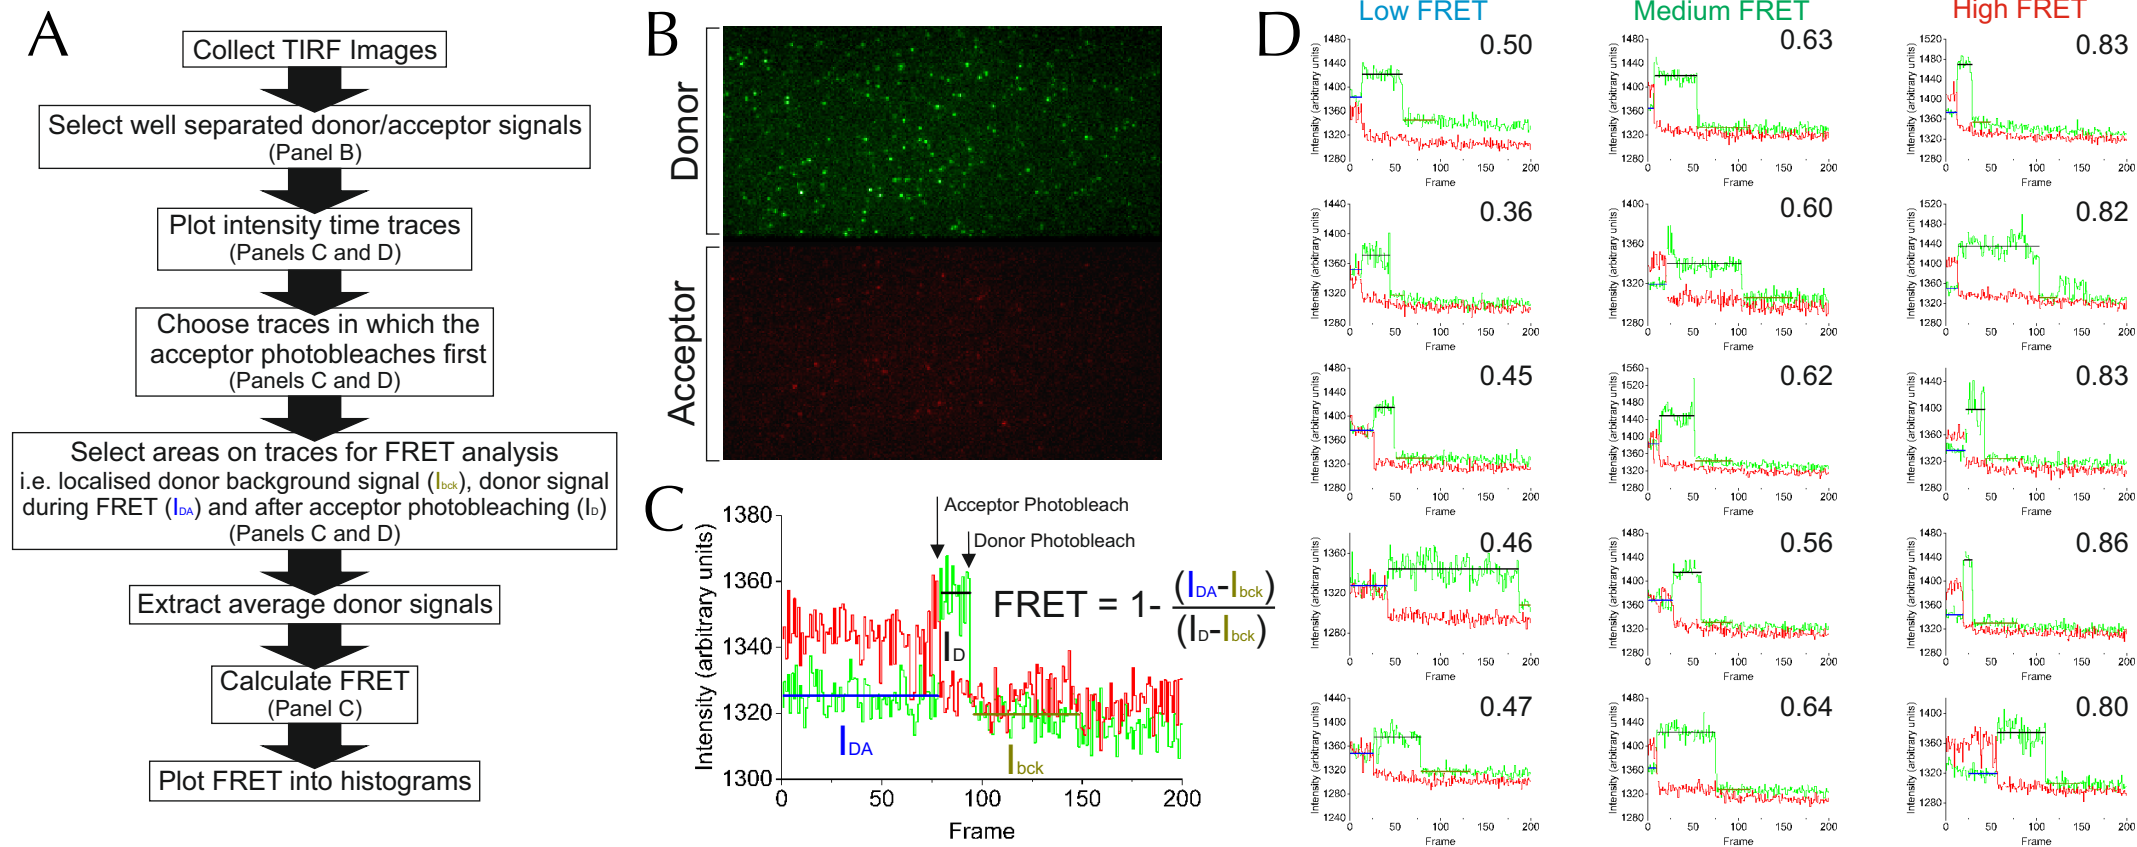

Supplement: supp [file elife-15598-supp-v1.zip › elife_poa_e15598_Figure_5_figure_supplement_1.pdf]

Figure 5S2 – Allen *et al.* 2016 – eLIFE

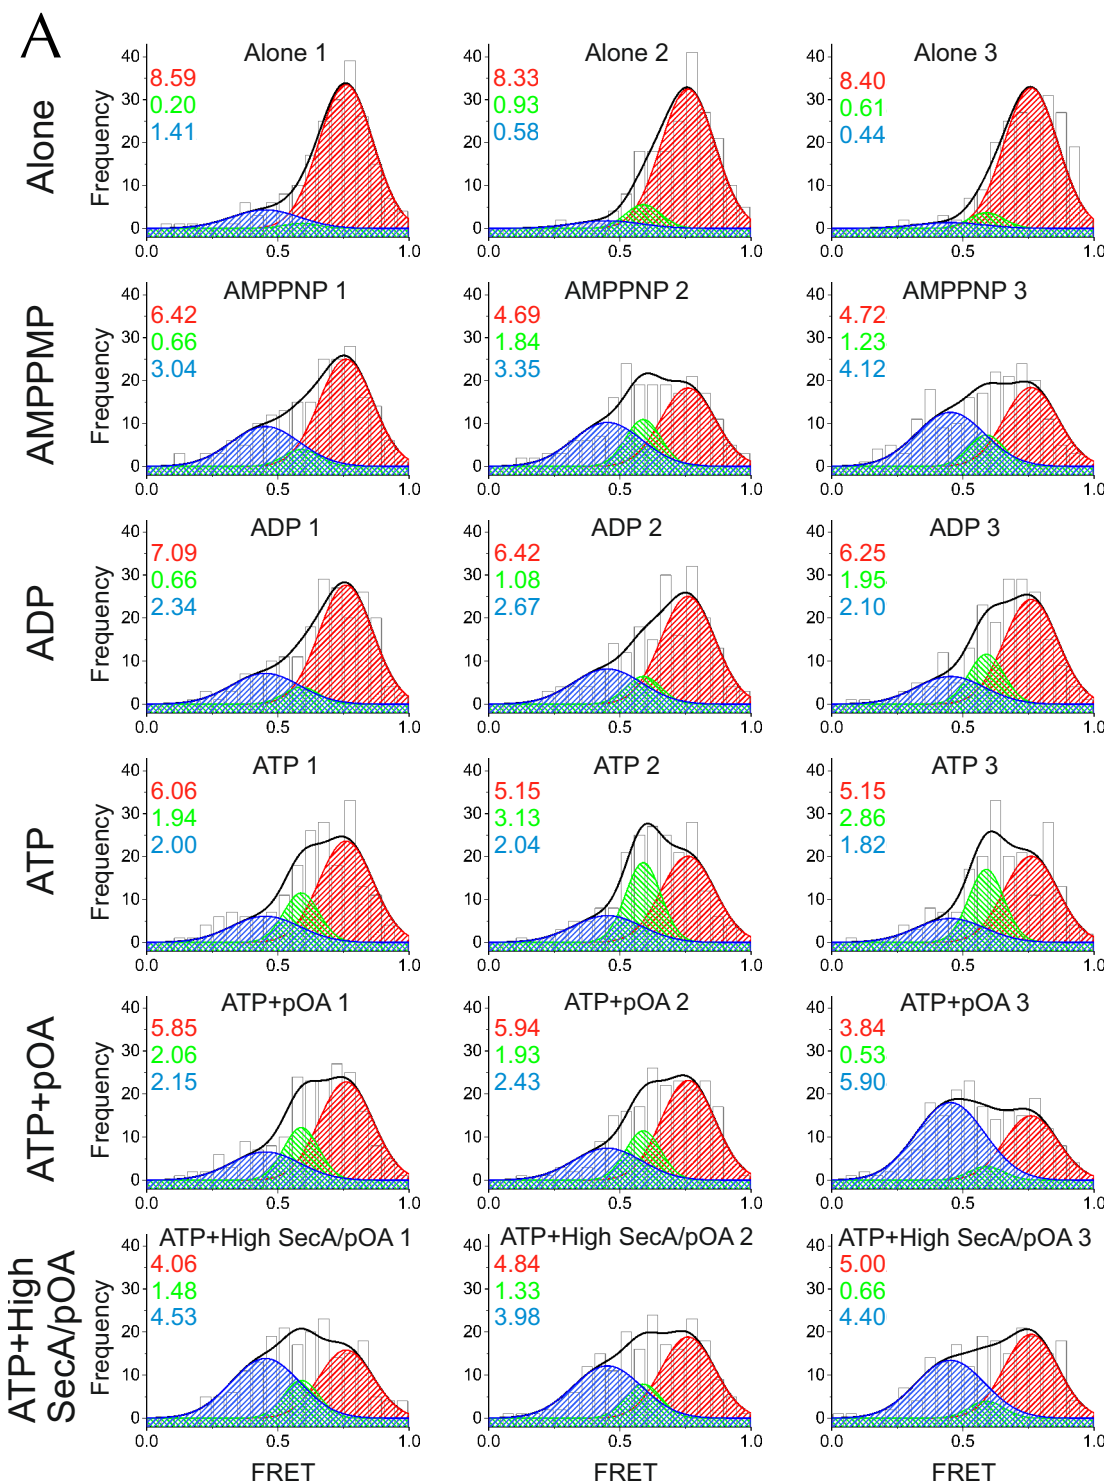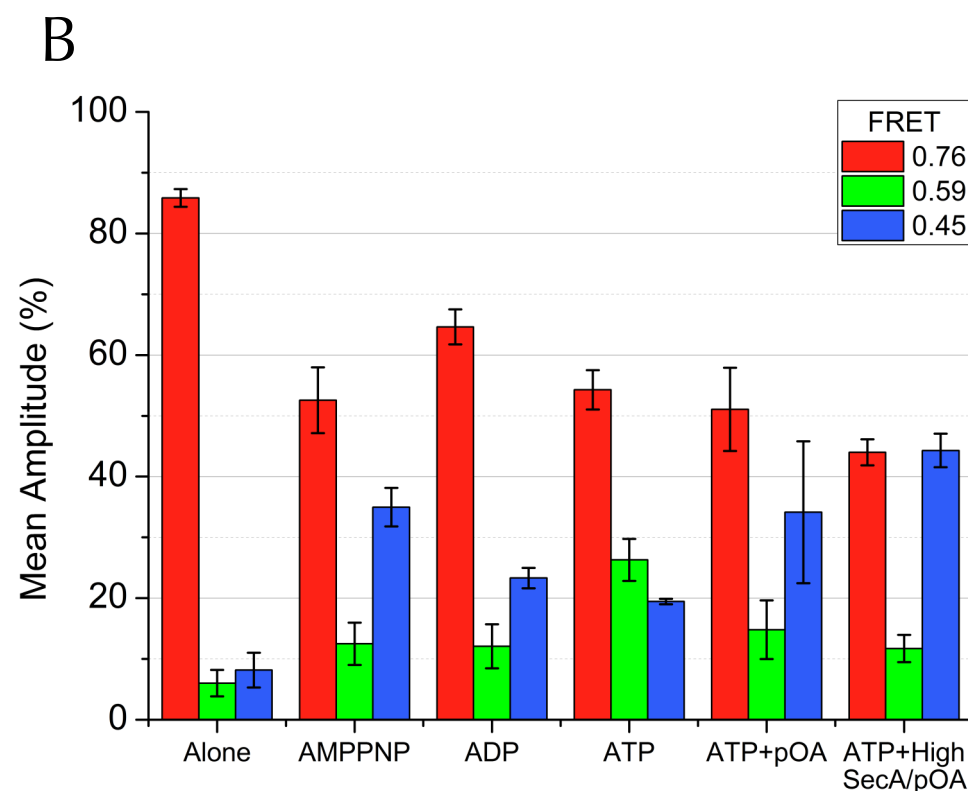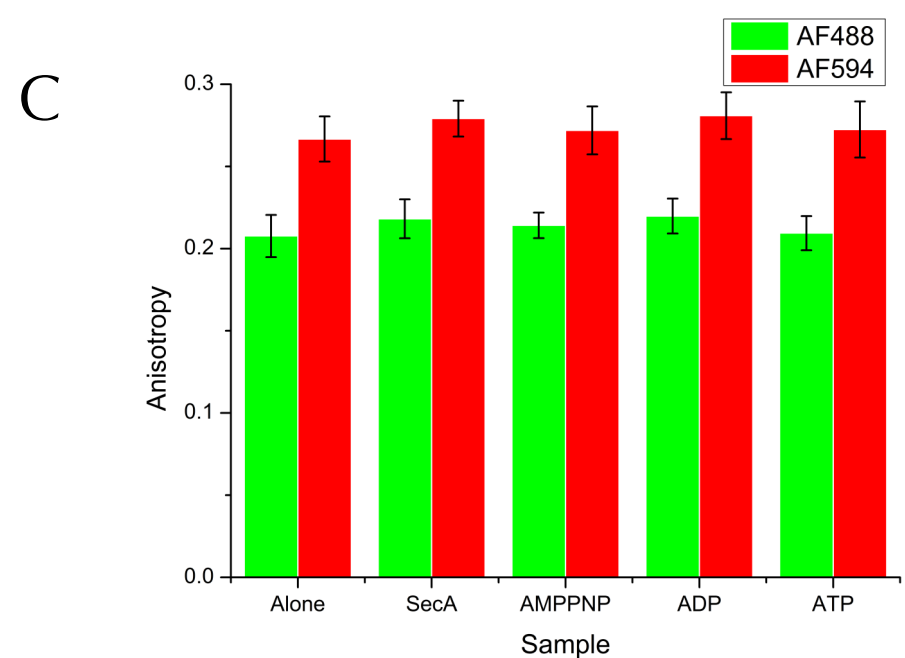

Supplement: supp [file elife-15598-supp-v1.zip › elife_poa_e15598_Figure_5_figure_supplement_2.pdf]

# Figure 2S2 – Allen *et al.* 2016 – eLIFE

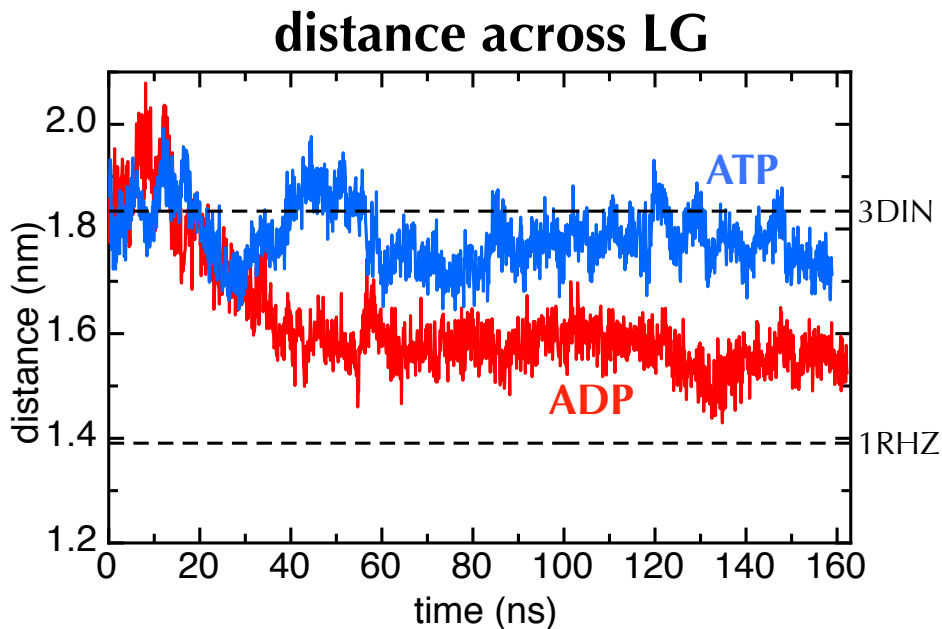

Supplement: supp [file elife-15598-supp-v1.zip › elife_poa_e15598_Figure_2_figure_supplement_2.pdf]

# A

## NBS solvent accessibility

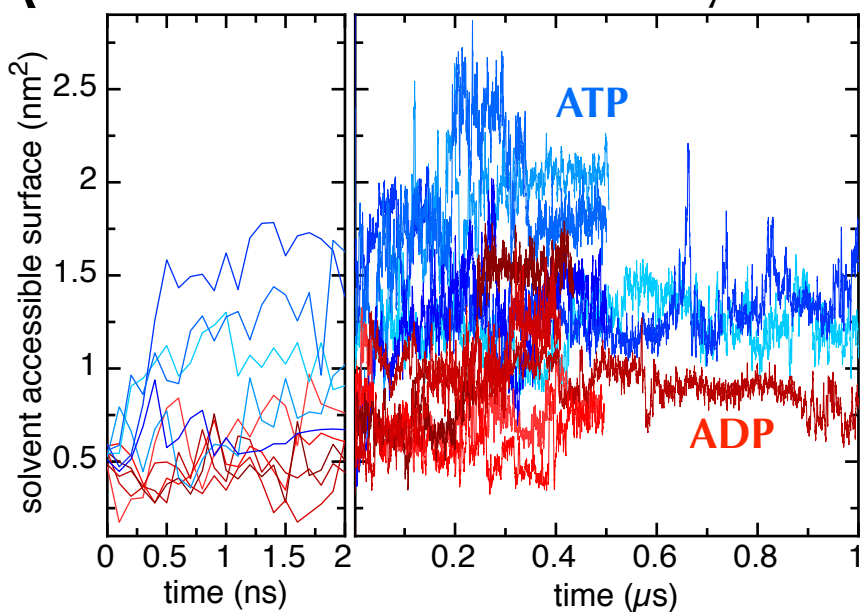

# B

## LG distance vs NBS accessibility

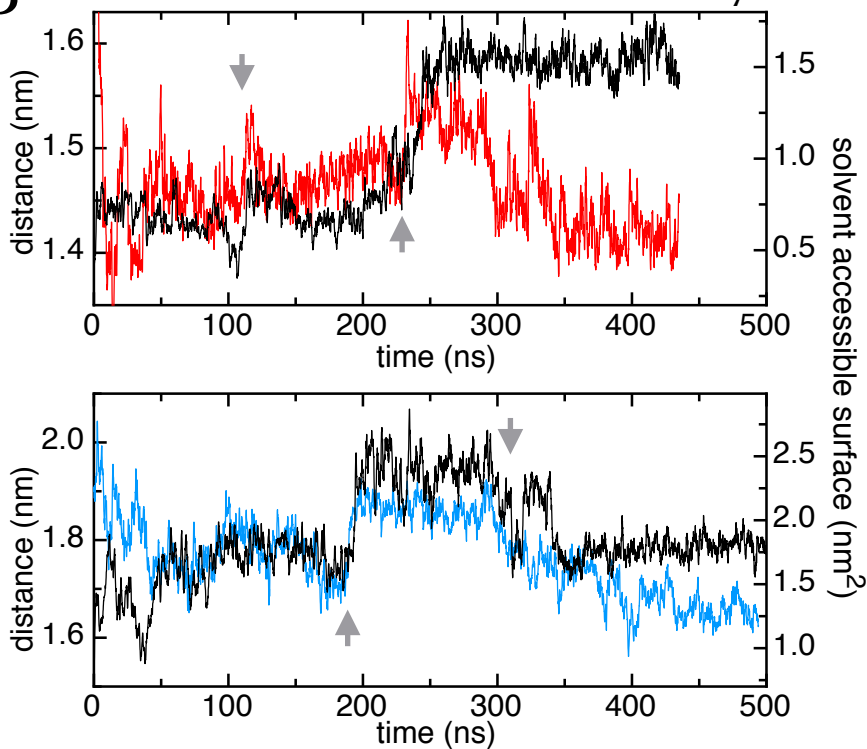

Supplement: supp [file elife-15598-supp-v1.zip › elife_poa_e15598_Figure_6_figure_supplement_1.pdf]

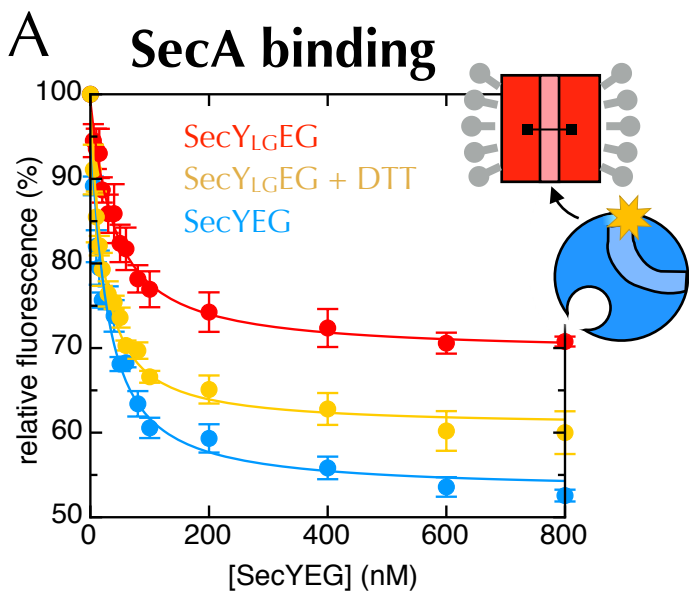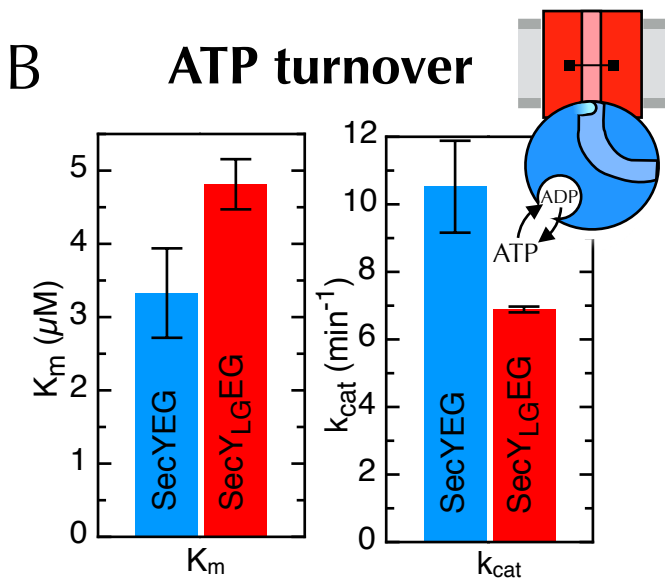

Supplement: supp [file elife-15598-supp-v1.zip › elife_poa_e15598_Figure_6_figure_supplement_3.pdf]

Figure 4S2 – Allen *et al.* 2016 – eLIFE

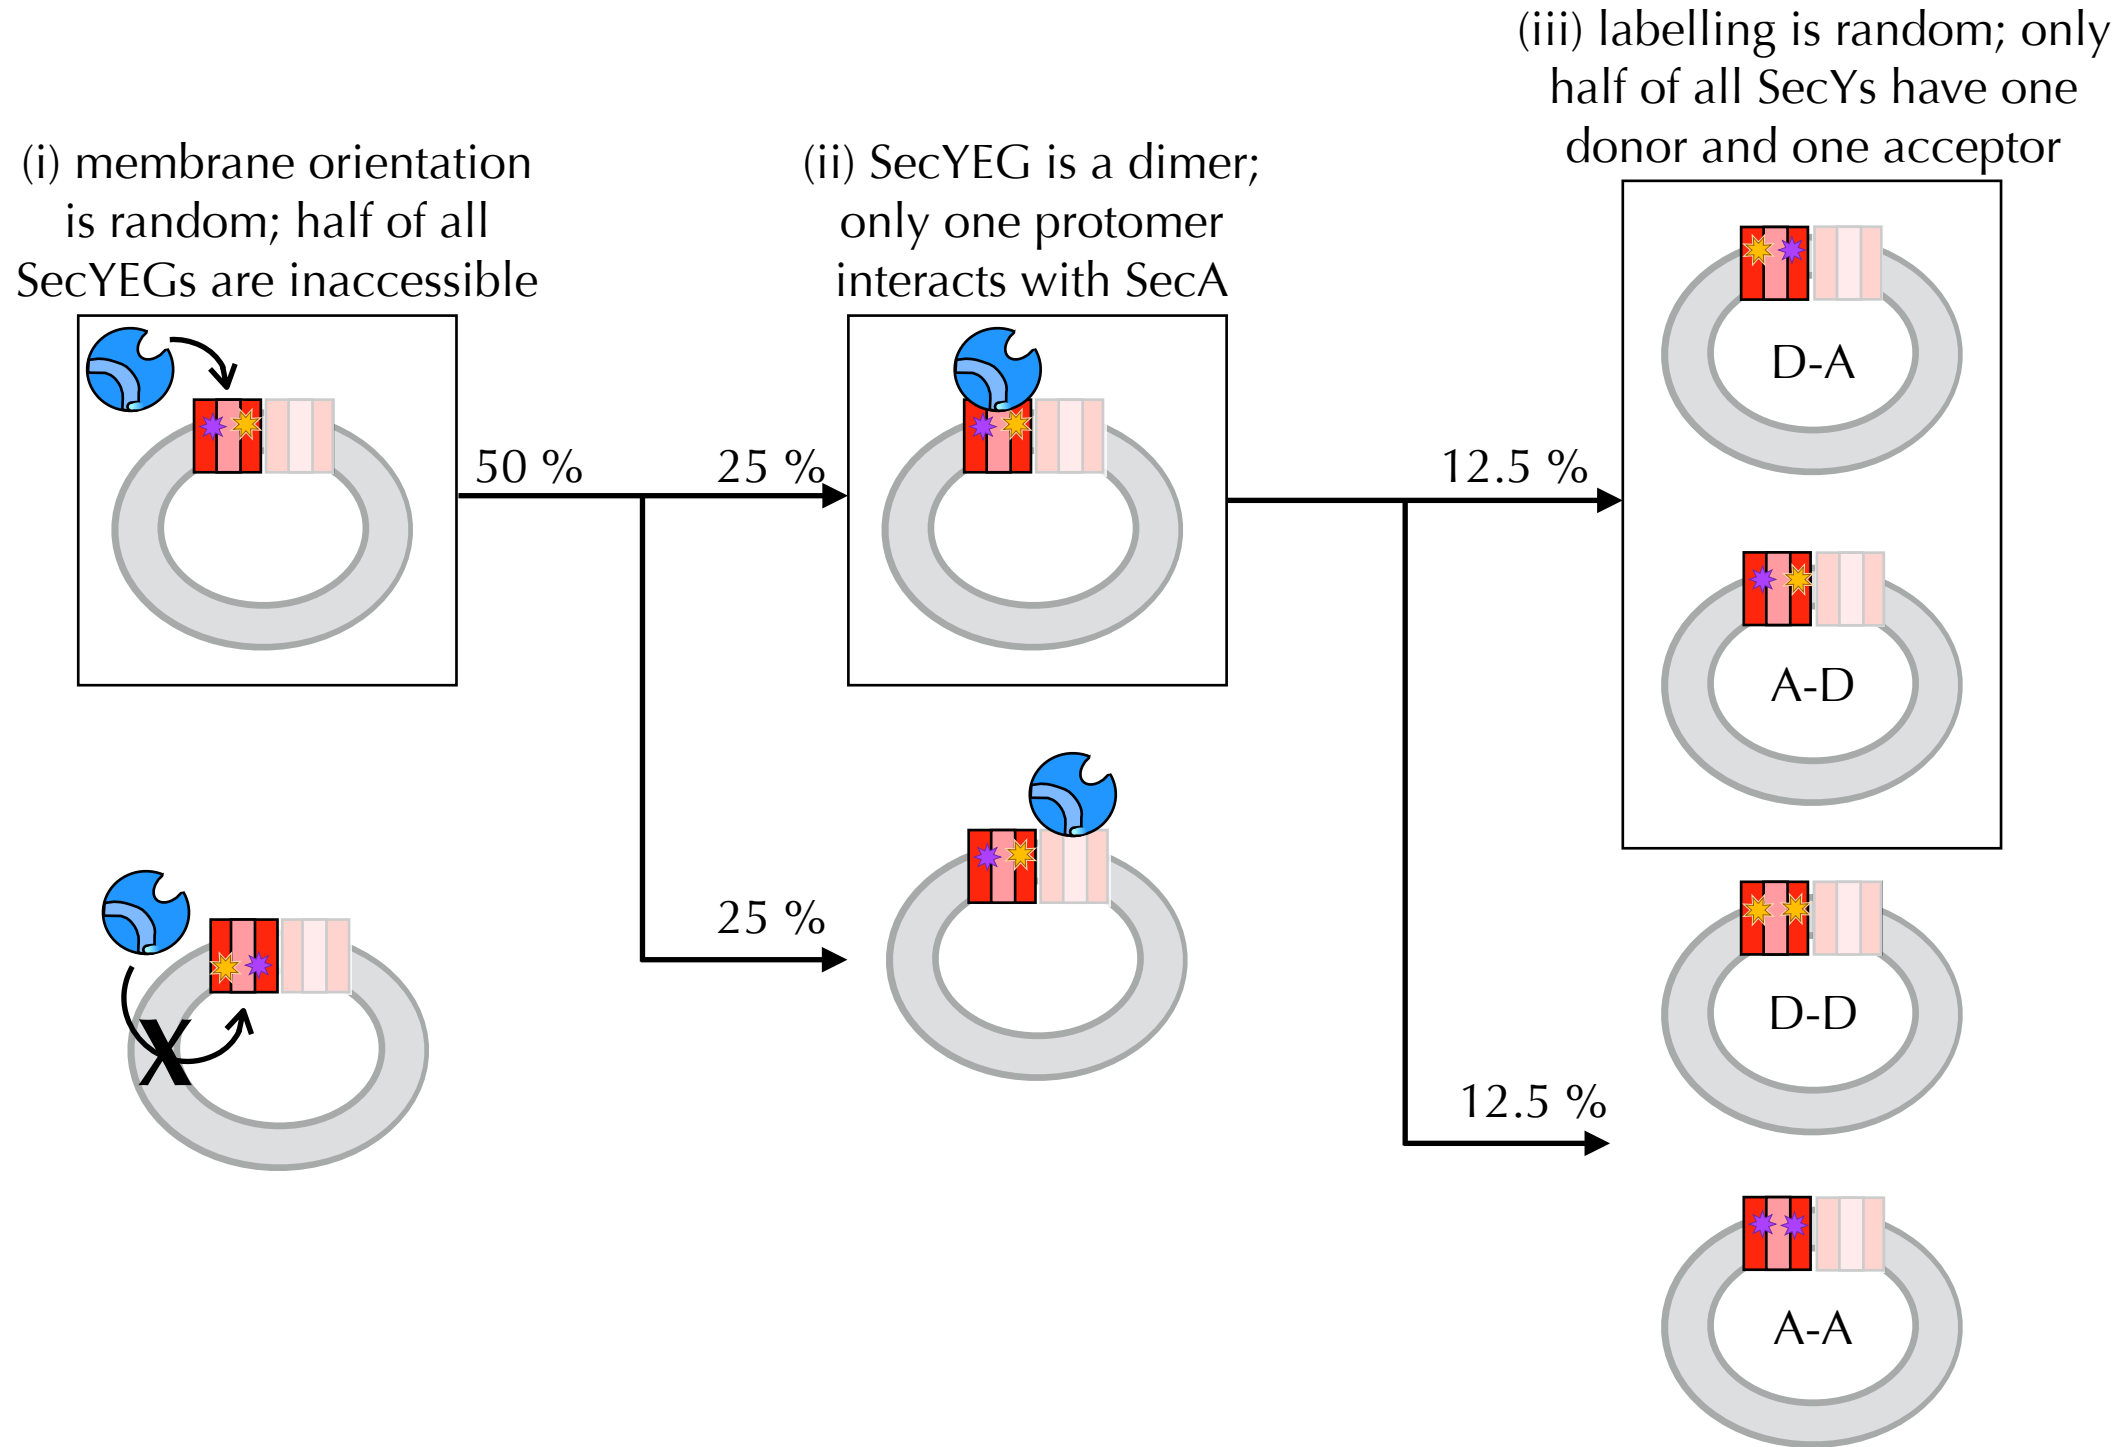

Supplement: supp [file elife-15598-supp-v1.zip › elife_poa_e15598_Figure_4_figure_supplement_2.pdf]

Figure 7S1 – Allen *et al.* 2016 – eLIFE

## ATP turnover

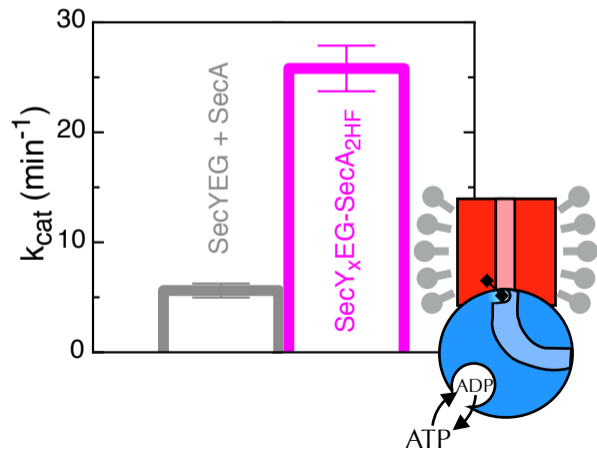

Supplement: supp [file elife-15598-supp-v1.zip › elife_poa_e15598_Figure_7_figure_supplement_1.pdf]

# Figure 5S3 – Allen *et al.* 2016 – eLIFE

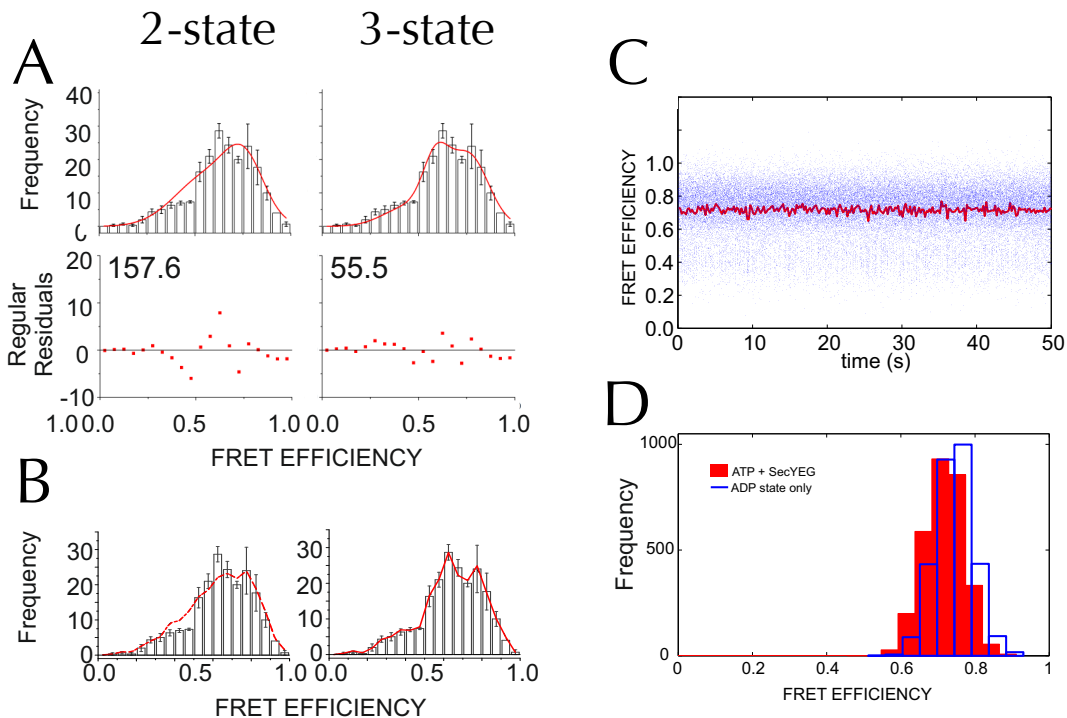

Supplement: supp [file elife-15598-supp-v1.zip › elife_poa_e15598_Figure_5_figure_supplement_3.pdf]

# Figure 4S1 – Allen *et al.* 2016 – eLIFE

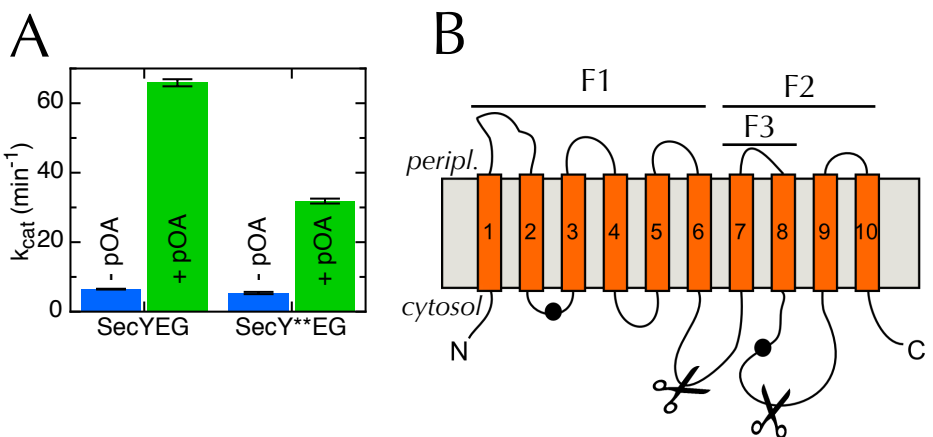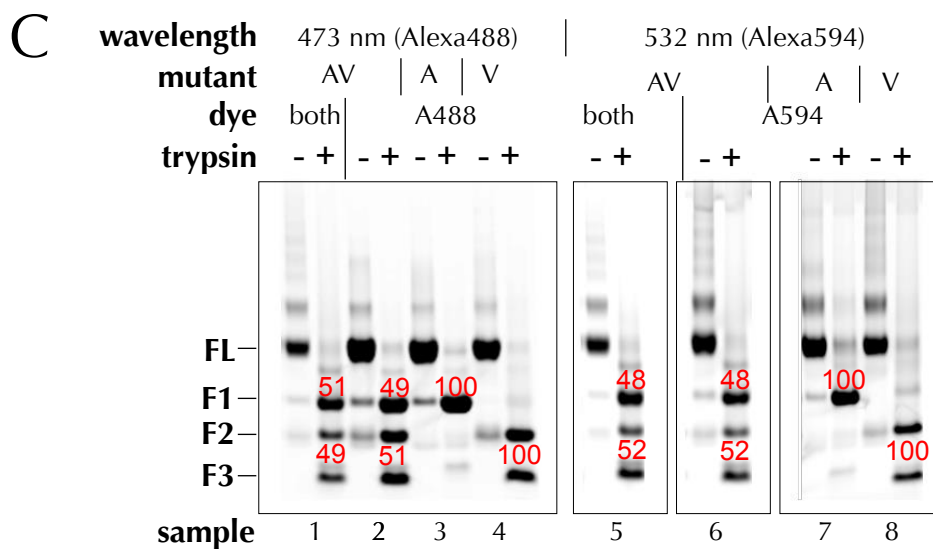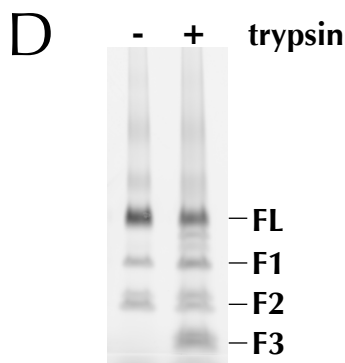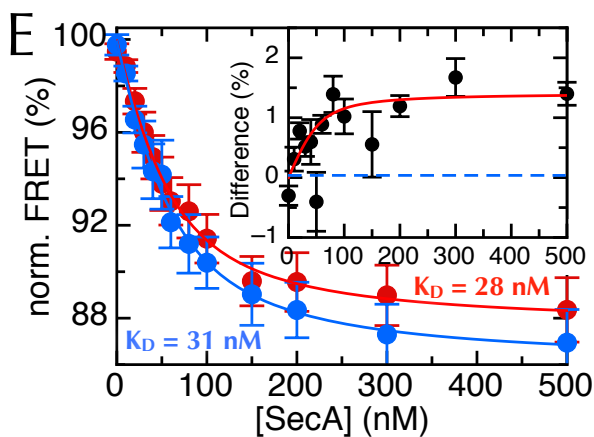

Supplement: supp [file elife-15598-supp-v1.zip › elife_poa_e15598_Figure_4_figure_supplement_1.pdf]

Figure 7S3 – Allen *et al.* 2016 – eLIFE

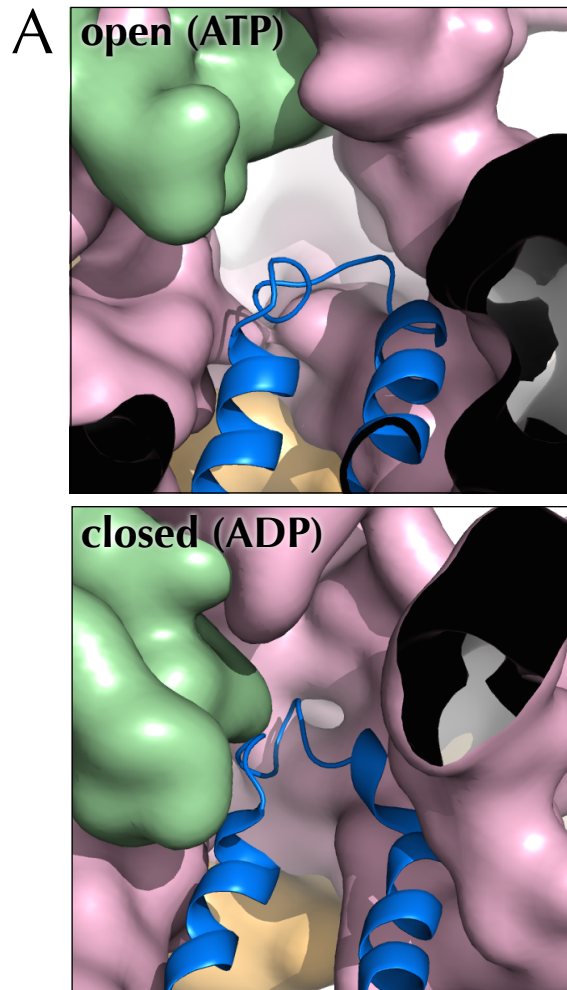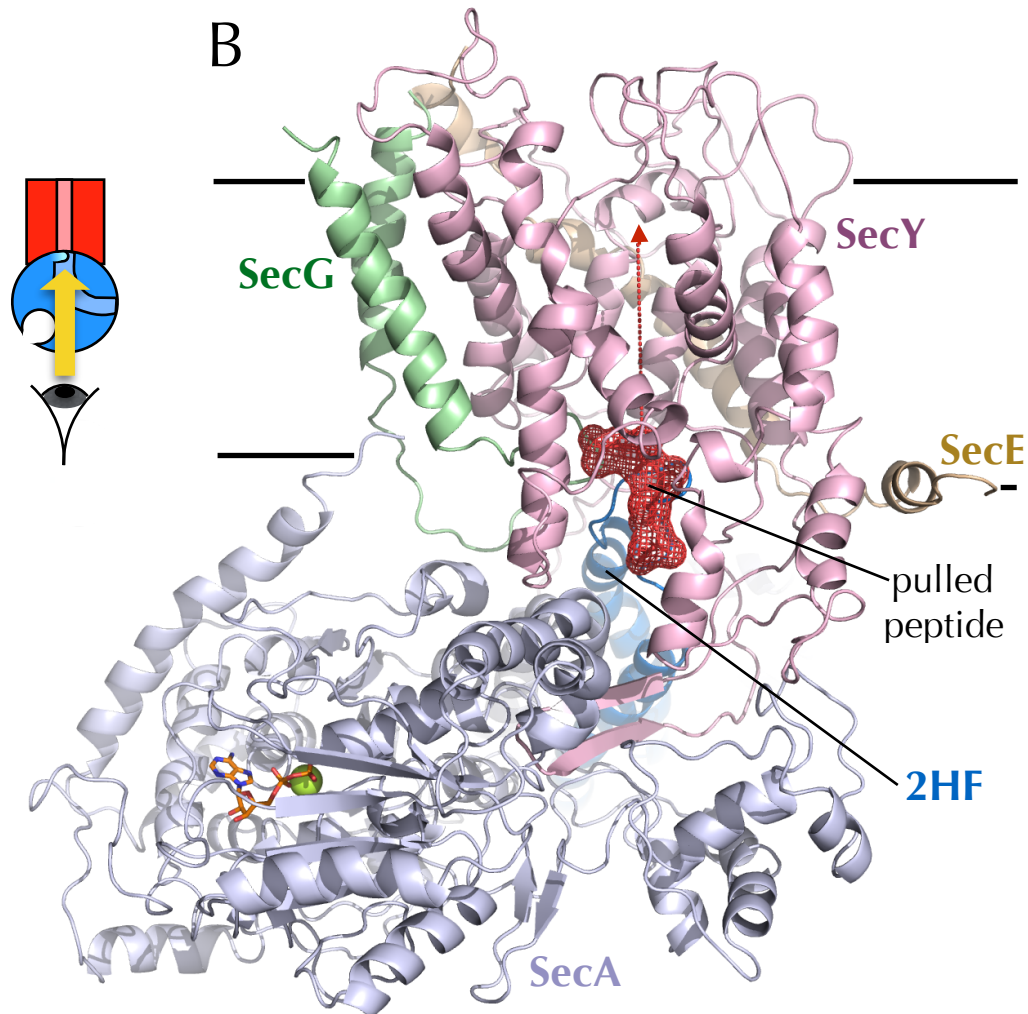

Supplement: supp [file elife-15598-supp-v1.zip › elife_poa_e15598_Figure_7_figure_supplement_3.pdf]

# Figure 7S2 – Allen *et al.* 2016 – eLIFE

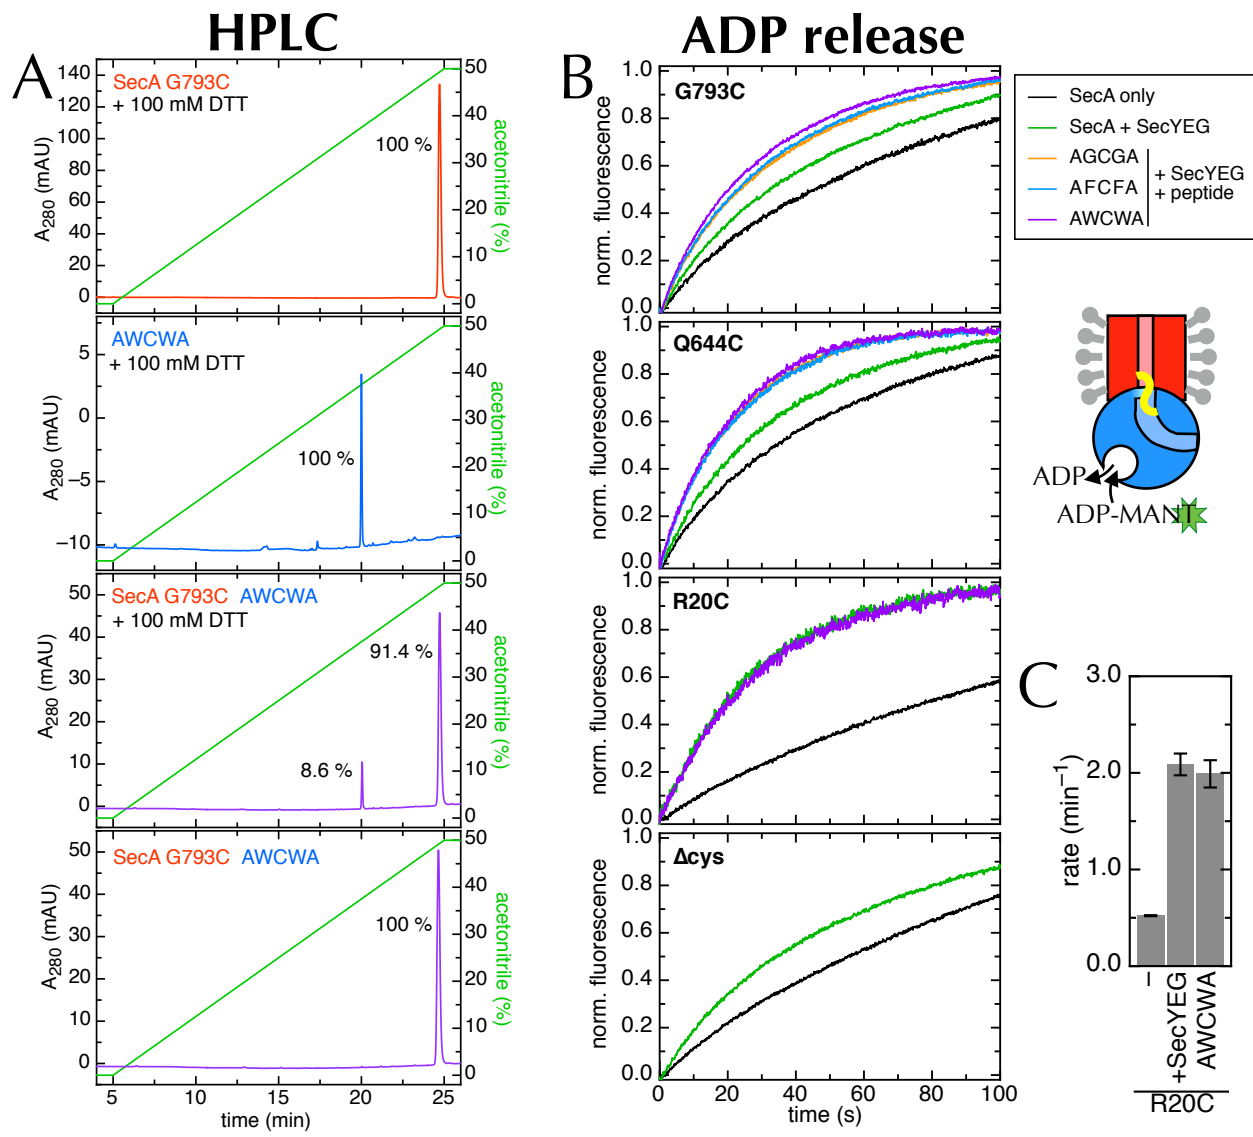

Supplement: supp [file elife-15598-supp-v1.zip › elife_poa_e15598_Figure_7_figure_supplement_2.pdf]

Figure 2S1 – Allen *et al.* 2016 – eLIFE

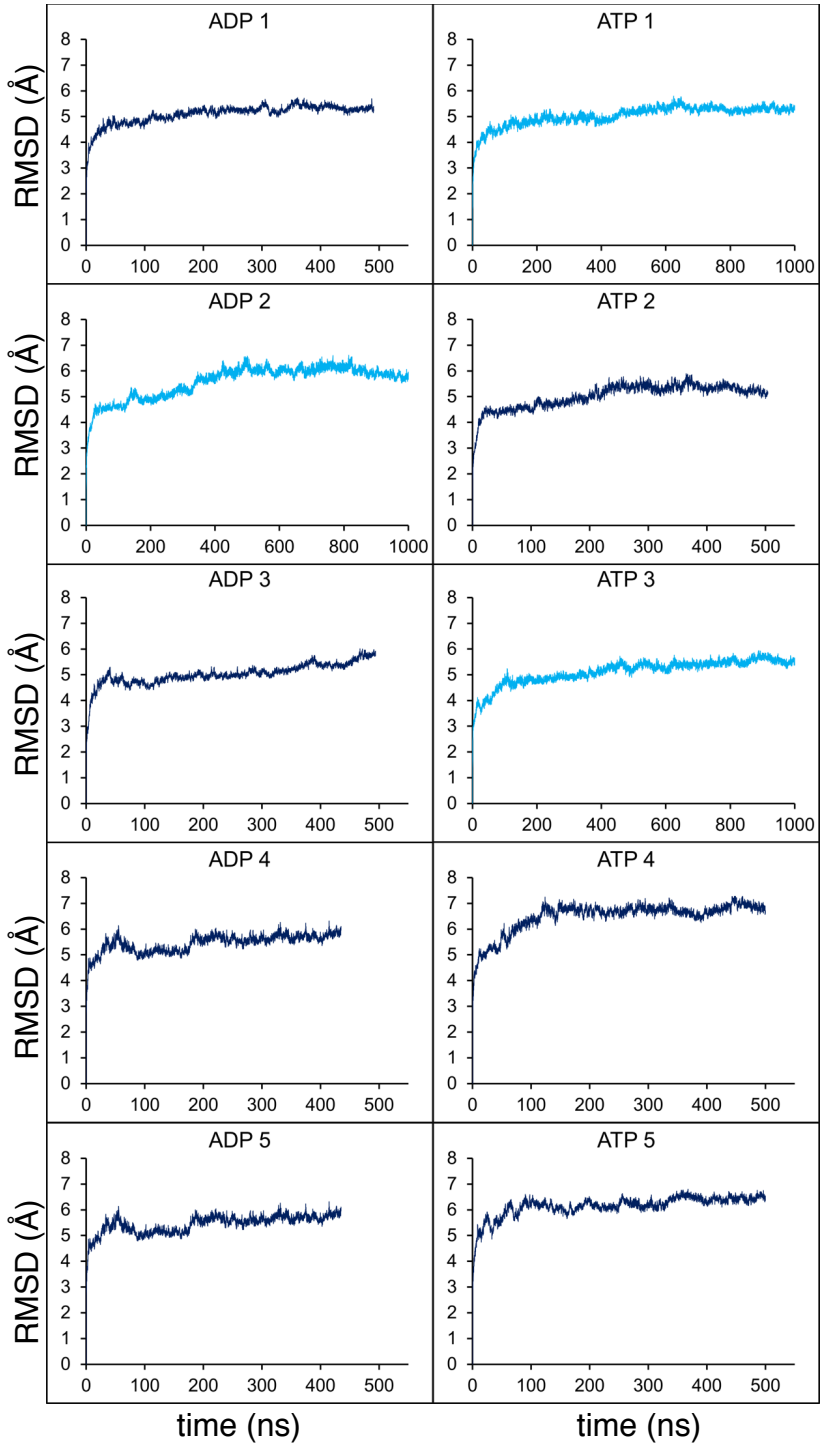

Supplement: supp [file elife-15598-supp-v1.zip › elife_poa_e15598_Figure_2_figure_supplement_1.pdf]
